**JUST  
PUBLISHED!**

# Management of Adults With Traumatic Brain Injury

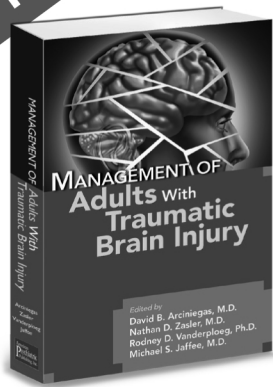

Edited by  
David B. Arciniegas, M.D.,  
Nathan D. Zasler, M.D.,  
Rodney D. Vanderploeg, Ph.D.,  
and Michael S. Jaffee, M.D.

*Management of Adults with Traumatic Brain Injury* is an up-to-the-minute, comprehensive, and useful text designed to support busy physicians, nurses, and mental health professionals

working with persons with traumatic brain injury (TBI) and their families. Understanding and improving outcomes after TBI requires consideration of the effects of biomechanical forces on the brain and the interactions between the injury, the person experiencing it, and the psychosocial context in which TBI and its consequences occur.

A multidisciplinary approach to the management of persons with TBI therefore is essential. Accordingly, this book presents and synthesizes the work of internationally recognized brain injury clinicians, scientists, and educators who were selected by a team of editors with backgrounds in psychiatry, neurology, psychology, and psychiatry. This broad range of perspectives enhances understanding and provides nuanced yet practical information on the neuropsychiatric management of persons with TBI.

Evidence-informed, concise, and clinically rich, this book will be of enormous value to health care providers grappling with the neurological and mental health consequences of this widespread public health problem.

The volume offers many useful features to its readers, including:

- Chapters written by an internationally known group of editors and contributors offering cutting-edge, multidisciplinary perspectives in brain injury medicine.
- Guidance on the identification and management of early and late postinjury neuropsychiatric disturbances as well as their psychological and psychosocial consequences.
- Identification of special issues relevant to the evaluation and treatment of TBI and postconcussive symptoms among military service members and Veterans.
- Discussion of the ethics and methods of forensic assessment of persons with TBI.
- Key Clinical Points that highlight concepts, assessment issues, and clinical management strategies in each chapter.
- A wealth of tables and figures to enhance the accessibility and clinical utility of the book, as well as appendices of additional readings and relevant websites for persons and families affected by TBI and the clinicians providing their care.

Impressive breadth and depth of coverage, logical structure, clinically rich detail, and concise presentation make *Management of Adults with Traumatic Brain Injury* a must-read for every physician, nurse, and mental health practitioner working to improve the lives of persons with TBI.

**2013 • 587 pages • ISBN 978-1-58562-404-1 • Paperback  
\$79.00 • Item #62404**

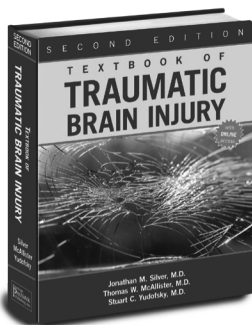

## Textbook of Traumatic Brain Injury, Second Edition

Edited by Jonathan M. Silver, M.D.,  
Thomas W. McAllister, M.D.,  
and Stuart C. Yudofsky, M.D.

This edition of *Textbook of Traumatic Brain Injury* has been thoroughly revised and updated from the 2005

first edition to reflect the exponential expansion of research and clinical data amassed in the intervening years. Each chapter was written and reviewed by the foremost authorities in neuropsychiatry, neurology, rehabilitation medicine, and the other specialties who assess, diagnose, and treat these patients.

The book has been closely edited to achieve a level of writing that is consistent and engaging and that addresses the needs of all medical professionals.

**2011 • 686 pages • ISBN 978-1-58562-357-0 • Hardcover  
\$169.00 • Item #62357**

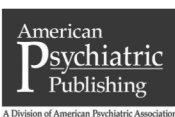

The *First* and *Last* Word in Psychiatry

Order Online: [www.appi.org](http://www.appi.org) • Phone: 1-800-368-5777

Fax: 703-907-1091 • Email: [appi@psych.org](mailto:appi@psych.org)

Find us on Facebook and Twitter.

Priority Code AH1315

**20% Discount  
For American Psychiatric  
Association Members!**

**25% Discount  
For APA Members-in-Training**

The end of your psychiatric residency is coming up—  
are you ready to land that perfect job?

Are you a 3rd year resident who wants to get  
started early?

# Let APA JobCentral help!

**APA JobCentral**, the job board for the American Psychiatric Association can help you ready yourself for the most important search of your career—that FIRST job. Whether it be a group practice, private practice, or hospital-based work environment you seek, JobCentral has over 1,200 open positions. You can search our jobs by location, position type, keyword, and work setting.

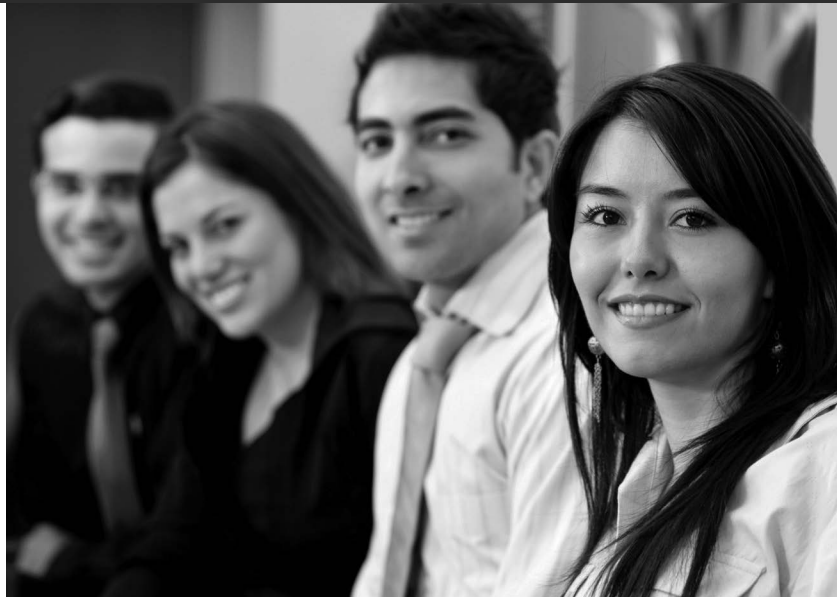

## How do I get started?

Simply visit [Jobs.psychiatry.org](http://Jobs.psychiatry.org) and take control of your future.

## Registration is free.

With a job-seeker account you can create a career profile, upload your resume, and search particular employers' open positions. If you are planning on attending the 2013 APA Annual Meeting, you will have the ability to flag your resume for meeting attendees to view. On-site interviews can be arranged.

## Have a specific location/specialty you're searching for?

Set up a job alert and be notified immediately when a position is posted with your desired criteria.

## Keep your resume on top of the others!

Use our free resume upgrade code **FREERES100**, while logged into your job-seeker profile to push your resume to the top of the screen.

## For more information please contact:

Eamon Wood • 212-904-0363 • [Ewood@pminy.com](mailto:Ewood@pminy.com)

**APA JobCentral**  
The Career Hub for Psychiatry

American  
Psychiatric  
Publishing  
A Division of American Psychiatric Association

AH1305

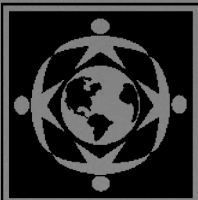

Institute on  
Psychiatric  
Services

American Psychiatric Association

# 65<sup>TH</sup> IPS

PHILADELPHIA

OCTOBER 10 – 13, 2013

APA's Leading Educational Conference on Public, Community, and Clinical Psychiatry

## Transforming Psychiatric Practice, Reforming Health Care Delivery

### Preliminary Program

#### Who Should Attend?

- ▶ All APA Members, including Early Career Psychiatrists and Psychiatric Residents
- ▶ International Psychiatrists
- ▶ Primary Care Physicians
- ▶ Mental Health Professionals from all disciplines

#### Why You Should Attend

- ▶ Earn CME credit from over 100 expertly-led education sessions.
- ▶ Network with 1,500 mental health professionals and obtain solutions for the challenges you face.
- ▶ Interact with experts in small-group settings.
- ▶ Acquire new skills in clinical psychiatry to improve patient care.
- ▶ Assess a variety of treatment choices, including psychotherapeutic and pharmacological options.

[www.psychiatry.org/IPS](http://www.psychiatry.org/IPS)

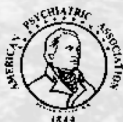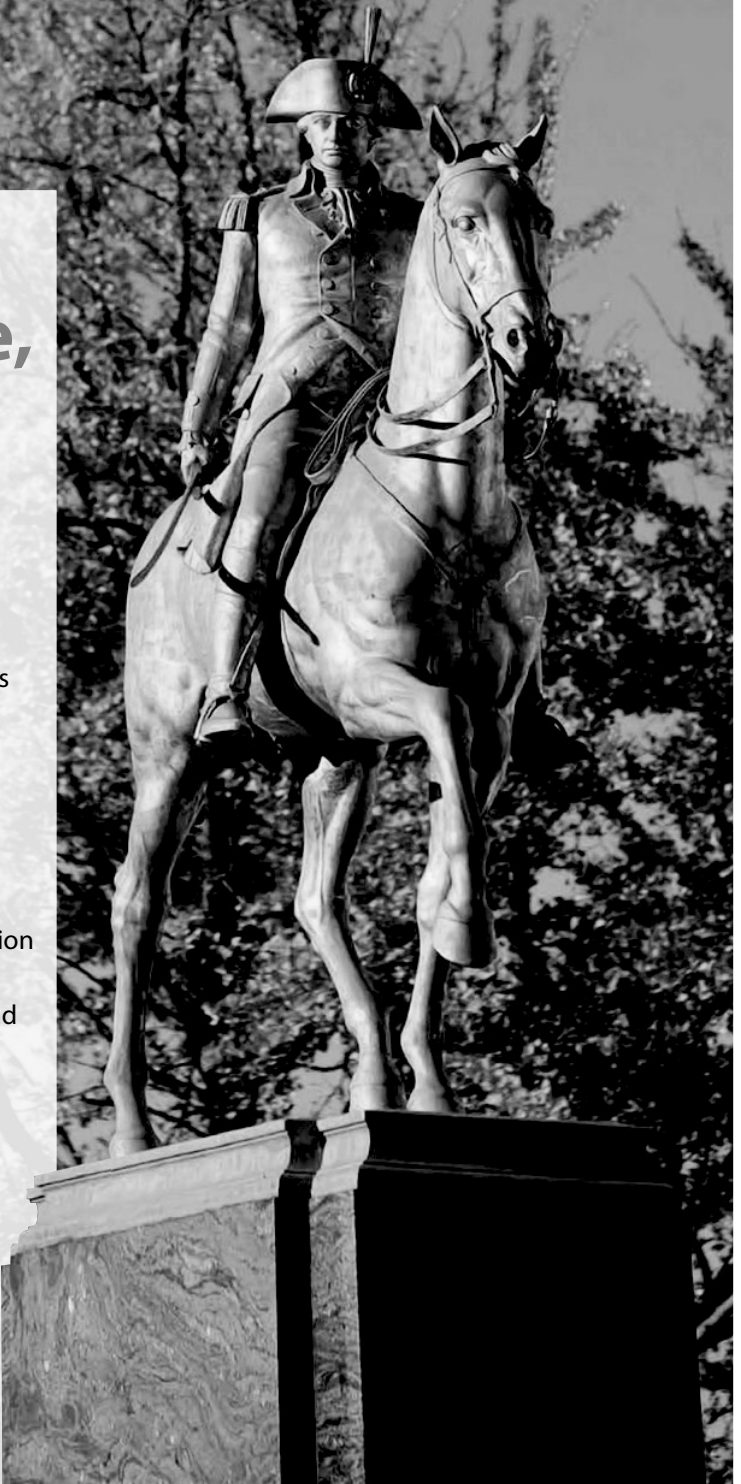

Source: https://focus.psychiatryonline.org/doi/suppl/10.1176/foc.2013.11.issue-3/suppl_file/back.pdf
