# FOCUS

THE JOURNAL OF LIFELONG LEARNING IN PSYCHIATRY

## *Posttraumatic Stress Disorder and Traumatic Brain Injury*

*Guest Editors: Kerry J. Ressler, M.D., Ph.D.*

*Barbara O. Rothbaum, Ph.D., ABPP*

### IN CLINICAL SYNTHESIS:

PTSD: Evidence-Based Psychotherapy and  
Emerging Treatment Approaches

*Cole G. Youngner, B.A.*

*Maryrose Gerardi, Ph.D.*

*Barbara O. Rothbaum, Ph.D., ABPP*

PTSD: Pharmacotherapeutic Approaches

*Matthew J. Friedman, M.D., Ph.D.*

Clinical Considerations in the Evaluation and Management  
of Patients Following Traumatic Brain Injury

*Henry J. Orff, Ph.D., et al.*

Performance in Practice: Clinical Module for the Care  
of Patients with Posttraumatic Stress Disorder

*Farifteh F. Duffy, Ph.D., et al.*

AND INFLUENTIAL PUBLICATIONS...
