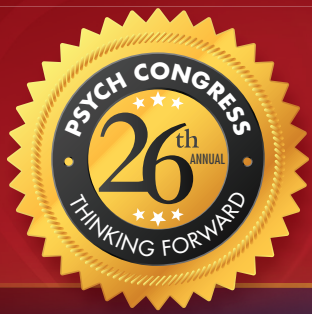

# U.S. Psychiatric AND Mental Health Congress CONFERENCE AND EXHIBITION 2013

f t in You Tube #psychcongress

REGISTER BEFORE AUG 23 AND SAVE UP TO \$400

September 30–October 3, 2013 THE VENETIAN, LAS VEGAS, NV

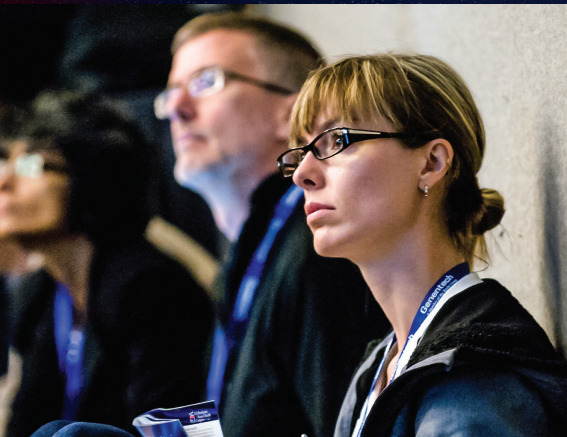

## POWERFUL PSYCH EDUCATION. INCREDIBLE VALUE.

- EARN UP TO 30 CME/CE CREDIT HOURS
- ATTEND MORE THAN 50 EDUCATIONAL SESSIONS
- INTERACT WITH MORE THAN 90 EXHIBITORS
- EXPLORE RESEARCH FROM OVER 90 POSTER PRESENTERS
- EXPERIENCE KEYNOTE SPEAKER ERIC ARAUZ AT OUR PRE-CONFERENCE KICK-OFF RECEPTION (NON-CME)

## PROGRAM PREVIEW

- TREATING THE WHOLE PATIENT | Beyond the Syndrome: Advances in the Integrated Science of Mood Disorders **JON W. DRAUD, MS, MD; RAKESH JAIN, MD, MPH; VLADIMIR MALETIC, MS, MD; CHARLES RAISON, MD; DILIP JESTE, MD**
- Successful Psychosocial Aging: Implications for Our Patients and Ourselves **DILIP JESTE, MD**
- Posttraumatic Stress Disorder: Recent Advances from Neurobiology to the Clinic **KERRY RESSLER, MD, PHD**
- Violence and Aggression: Managing the Acute Episode and Beyond **LESLIE CITROME, MD, MPH**
- The Dementia Dilemma: Diagnosis and Treatment of Agitation and Psychosis **MARC AGRONIN, MD**
- Pre-menstrual Dysphoric Disorder and Menopausal Depression **MARLENE FREEMAN, MD**
- ADHD Across the Lifespan: An Update **TIMOTHY WILENS, MD**
- Using Benzodiazepines: The Good, The Bad, and The Ugly **RAKESH JAIN, MD, MPH, AND SAUNDRA JAIN, MA, PSYD, LPC**
- Bringing Accountability to Office-Based Treatment of Depression **MARK ZIMMERMAN, MD**
- Taming the Beast: Practical and Effective Non-Pharmacological Treatment Options for Bipolar Depression **SAUNDRA JAIN, MA, PSYD, LPC**
- Diagnosis of Bipolar Disorder: Underdiagnosis, Overdiagnosis, and Why Screening Scales Are Not Good Enough **MARK ZIMMERMAN, MD**
- Neurostimulation for Mood Disorders **SCOTT AARONSON, MD**
- The Perils and Promise of Psychoactive Drugs: A Focus on Harm Reduction Psychiatry **ANDREW PENN, RN, MS, NP, CNS, APRN-BC**
- When Your Patient Dies by Suicide: Aftermath and Implications **BENJAMIN SADOCK, MD**
- DSM-5 Overview: What Clinicians Need to Know and Practical Applications **DARREL A. REGIER, MD, MPH**

The 2013 Psych Congress Scientific Program is Complete! DOWNLOAD THE ATTENDEE BROCHURE AT OUR WEBSITE

WWW.PSYCHCONGRESS.COM/PSYCHCONGRESS 800-237-7285 EXT. 233

**INTENDED LEARNERS** This activity is intended for psychiatrists, primary care physicians, psychologists, physician assistants, psychiatric nurses, and other health care professionals who seek to improve the care of patients with mental health disorders.

**LEARNING OBJECTIVES** After completing this activity, participants should be able to:

- Identify the etiology, pathophysiology, and neural pathways of various psychiatric disorders and their effects on patients
- Implement evidence-based models on the use of psychotherapeutic and pharmacotherapeutic interventions to develop treatment plans, predict treatment response, optimize remission, and prevent relapse
- Employ strategies to identify and remove barriers to treatment to improve patient outcomes

in the acute and long-term management of psychiatric disorders

- Increase ability to assess psychiatric disorders as well as patient's overall health, including comorbidities, with the goal of improving diagnosis and treatment

**ACCREDITATION INFORMATION** In support of improving patient care, North American Center for Continuing Medical Education, LLC (NACCME), is accredited by the Accreditation Council for Continuing Medical Education (ACCME), the Accreditation Council for Pharmacy Education (ACPE), and the American Nurses Credentialing Center (ANCC) to provide continuing education for the health care team.

**CME** NACCME designates this live activity for a maximum of 30 AMA PRA Category 1 Credits™. Physicians should claim only the

credit commensurate with the extent of their participation in the activity.

**CNE** This continuing nursing education activity awards 30.0 contact hours.

Provider approved by the California Board of Registered Nursing, Provider #13255 for 30.0 contact hours.

**APA** North American Center for Continuing Medical Education, LLC (NACCME) is approved by the American Psychological Association to sponsor continuing education for psychologists. NACCME maintains responsibility for this program and its content.

**INSTRUCTIONAL LEVEL** Advanced

**REQUIREMENTS FOR CREDIT** To be eligible for documentation of credit, participants must attend the educational activity and complete the evaluation form. After successful completion

of the evaluation form online, participants may immediately print their documentation of credit.

Physician assistants, nurse practitioners, and nurses may participate in this educational activity and earn a certificate of completion as AAPA, AANP, and ANCC accept AMA PRA Category 1 Credits™ through their reciprocity agreements.

Other health care professionals treating patients with mental health disorders should check with their state licensing and certification boards to determine if Psych Congress meets their continuing education requirements.

**CONTACT INFORMATION** For questions regarding this educational activity, please call 609-630-6252.

Copyright © 2013 by North American Center for Continuing Medical Education, LLC. All rights

reserved. No part of this accredited continuing education activity may be reproduced or transmitted in any form or by any means, electronic or mechanical, without first obtaining permission from North American Center for Continuing Medical Education.

ADA statement: North American Center for Continuing Medical Education complies with the legal requirements of the Americans with Disabilities Act and the rules and regulations thereof. If any participant in this educational activity is in need of accommodations, please call 609-371-1137.

Supported in part by independent educational grants from Lilly USA, LLC, Sunovion Pharmaceuticals, Inc., PamLab, and Takeda Pharmaceuticals International, Inc. and Lundbeck.
